# Supplementary material for: Ni3FeN functionalized carbon nanofibers boosting polysulfide conversion for Li–S chemistry
Source: Royal Society of Chemistry journal article supplement (doi:10.1039/d1ra09041k), 2022-01-01
Supplement: d1ra09041k1.pdf [file d1ra09041k1.pdf]

**Anchoring Ni<sub>3</sub>FeN on a carbon nanofibers as an efficient polysulfide adsorption  
and catalyst center for improved Li-S battery**

Lufu Xu <sup>a</sup>, Huani Li <sup>a</sup>, Genfu Zhao <sup>a</sup>, Yongjiang Sun <sup>a</sup>, Han Wang, Hong Guo <sup>a\*</sup>

<sup>a</sup>School of Materials and Energy, Yunnan University, Kunming 650091, China

Corresponding Author

E-mail: guohong@ynu.edu.cn (H. Guo)

## Experimental section

**Synthesis of NiFe-LDH and Ni<sub>3</sub>FeN.** 170 mg Fe(NO<sub>3</sub>)<sub>3</sub>·9H<sub>2</sub>O, 367.5 mg Ni(NO<sub>3</sub>)<sub>2</sub>·6H<sub>2</sub>O, and 9 g urea were dissolved in 50 mL water and stirred in oil bath (synchronous reflux device) at 100 °C for 6 h. After the reaction, the NiFe-layered double hydroxides (NiFe-LDH) were washed (vacuum filtered) three times with deionized water, and then freeze-dried for 12 h. Then, the as-prepared NiFe-LDH was treated at 400 °C in ammonia atmosphere for 2 h to prepare Ni<sub>3</sub>FeN.

**Synthesis of CNFs@Ni<sub>3</sub>FeN and CNFs.** 1.2 g Polyacrylonitrile (PAN) (Mw=150000), 0.012 g Polystyrene (PS) (Mw=280000) and 0.1 g F127 were dissolved in 10 mL N, N-dimethylformamide (DMF) under intense stirring at 50 °C, then the synthesized Ni<sub>3</sub>FeN was added and stirred together to obtain the precursor. The precursor was injected into the syringe to prepare carbon nanofibers, which were spun at the voltage of 18 kV and the speed of 0.5 mL/h. The distance between the tip and the rotating cylinder was maintained at 16 cm, and the nanofibers were collected at the speed of 30 rpm through a rotating drum coated with aluminum foil. After electrospinning, the fibers were stabilized in air at a speed of 1 °C/min for 2 h at 260 °C. Subsequently, the fibers were carbonized in argon atmosphere (800 °C, 2 h) to obtain the composite of porous carbon nanofiber and Ni<sub>3</sub>FeN, which is recorded as CNFs@Ni<sub>3</sub>FeN. The CNFs was synthesized by the same method as CNFs@Ni<sub>3</sub>FeN without introducing Ni<sub>3</sub>FeN.

**Synthesis of CNFs@Ni<sub>3</sub>FeN@S and CNFs@S.** A certain amount of sulfur powder was dissolved in CS<sub>2</sub>. After the sulfur powder was completely dissolved, the CNFs@Ni<sub>3</sub>FeN sheet was added to the S solution, in which the mass ratio of sulfur powder to CNFs@Ni<sub>3</sub>FeN was 4:1. Then, the sample was transferred to the ventilator. After the CS<sub>2</sub> was volatilized completely, the mixture of CNFs and S was placed in the ampoule bottle and sealed with a spray gun. Afterwards, the mixture was heated to 155 °C at a rate of 5 °C/min and heat treated for 12 h to fully mix CNFs@Ni<sub>3</sub>FeN and sulfur powder to get CNFs@Ni<sub>3</sub>FeN@S. The synthesis method of CNFs@S was the same as the above method CNFs@Ni<sub>3</sub>FeN@S.

## Materials Characterization

X-ray diffraction (XRD) was used for qualitative phase analysis of materials (Cu K $\alpha$ ,  $\lambda$ =1.5418 Å, 10°~90°, 20°/min, 40 KV, 30 mA, Bruker D8, Japan). The scanning electron microscopy (SEM) (AMRAY 1000B) and transmission electron microscopy (TEM) (JEM-2010) was used to observe the morphology of the material. The Fourier transform infrared (FT-IR) spectra of the materials were evaluated on Nicolet IS10

(Thermo Fisher Scientific). The content and valence of elements and the bond cooperation between elements were evaluated by X-ray photoelectron spectroscopy (XPS) recorded by k-alpha (Thermo Fisher Scientific Company), in which the radiation source was mono Al K $\alpha$ . The Raman spectrum was carried out on RM-1000 (Renishaw) and the excitation laser was 632.8 nm. The loading amount of S in the material was determined by thermogravimetric analysis (TGA) in N<sub>2</sub> atmosphere (heating rate 10 °C/min) (TG50 analyzer, Mettler-Toledo).

### **The preparations of Li<sub>2</sub>S<sub>4</sub> and Li<sub>2</sub>S<sub>6</sub> catholyte**

**(1) Preparation of Li<sub>2</sub>S<sub>4</sub> electrolyte (0.02 mol/L):** The mixture of lithium sulfide (Li<sub>2</sub>S) and sulfur powder with a molar ratio of 1:3 was added to 1,2-dimethoxyethane (DME), and then the Li<sub>2</sub>S<sub>4</sub> solution was obtained by magnetic stirring for 24 h, so that the polysulfide adsorption experiment could be carried out in the later stage.

**(2) Preparation of Li<sub>2</sub>S<sub>6</sub>/Tetraethylene glycol dimethyl ether electrolyte (2.5 mol/L):** The mixture of lithium sulfide (Li<sub>2</sub>S) and sulfur (S<sub>8</sub>) with a molar ratio of 1:5 was added to the LiTFSI (lithium bis[(trifluoromethyl)sulfonyl]imide) of 0.5 mol/L, which also contained lithium nitrate (LiNO<sub>3</sub>) (0.15 mol/L), followed by magnetic stirring to obtain Li<sub>2</sub>S<sub>6</sub>/Tetraethylene glycol dimethyl ether electrolyte for 24 h under the condition of heating in the glove box.

### **Static adsorption and the interaction between CNFs@Ni<sub>3</sub>FeN and Polysulfide**

The CNFs and CNFs@Ni<sub>3</sub>FeN with the same surface area were added to the configured 1.5 mL Li<sub>2</sub>S<sub>4</sub> electrolyte solution. The exact addition of CNFs and CNFs@Ni<sub>3</sub>FeN was determined by their respective specific surface areas. Subsequently, the material placed in the glove box filled with high purity argon for 3 h and observe the color change after adsorption.

### **Battery assembly and electrochemical tests**

**(1) Half battery assembly and test:** First, CNFs@Ni<sub>3</sub>FeN@S or CNFs@S, polyvinylidene fluoride (PVDF) and Ketjen black with a weight ratio of 8:1:1 was mixed in an NMP solvent to form a stable slurry, which was then coated on aluminum foil to prepare the working electrode. Then, they were dried in a vacuum drying oven at 80 °C for 12 h. The electrode was rolled after drying, and the rolling range was controlled at 15-60  $\mu$ m. After that, the rolled electrode sheet was cut into a round sheet with a diameter of 14 mm and the sulfur loading was about 3.5 mg cm<sup>-2</sup>. The 2025 button batteries were assembled in a glove box filled with high purity argon. The

cathode material was CNFs@Ni<sub>3</sub>FeN@S or CNFs@S, lithium plate was the anode, and Celgard polypropylene (PP) membrane was the separator. The electrolyte was 1 M LiTFSI dissolved in DME/DOL (V<sub>DME</sub>: V<sub>DOL</sub>=1:1) solution, in addition, 2% LiNO<sub>3</sub> was used as additive.

The cycle performance and rate performance of the battery was tested at 1.7-2.8 V under a certain current density, and the equipment was LAND Battery Test system (CT2011). The redox performance of the materials and the catalytic performance of Ni<sub>3</sub>FeN was characterized by cyclic voltammetry (CV). The tested voltage range was from 1.7 to 2.8 V and the scanning rate was 0.1 mV s<sup>-1</sup>. CV measurements were performed on Princeton Electrochemistry Workstation. Electrochemical impedance spectroscopy (EIS) was tested on CHI604E. The frequency range of the test was 0.01 Hz to 100 kHz.

## **(2) Symmetrical battery assembly and test:**

The CNFs@Ni<sub>3</sub>FeN@S or CNFs@S, PVDF and Ketjen black with a weight ratio of 8:1:1 was mixed in an NMP solvent to form a stable slurry, which was then coated on aluminum foil to prepare the working electrode. Then, the mixed slurry was coated on the aluminum foil and dried at 80 °C for 12 h. After that, the electrode was rolled and cut into a disc with a diameter of 14 mm and the sulfur loading was about 1.24 mg cm<sup>-1</sup>. The prepared electrode was used as the positive and negative electrode of the symmetrical battery, the separator was made of PP membrane, and the electrolyte was prepared with Li<sub>2</sub>S<sub>6</sub>/tetraethylene glycol dimethyl ether solution. The symmetrical cells were tested by CV (-0.8-0.8 V, 50 mV s<sup>-1</sup>) and potentiostatic mode EIS (0.1-10 kHz) on the electrochemical workstation.

**(3) In-situ FT-IR experiments:** The CNFs@Ni<sub>3</sub>FeN@S, polyvinylidene fluoride (PVDF) and Ketjen black with a weight ratio of 8:1:1 was mixed in an NMP solvent to form a stable slurry, which was then coated on carbon paper to prepare the working electrode. Then, they were dried in a vacuum drying oven at 80 °C for 12 h. Afterwards, the dried electrode sheet was cut into round pieces with a diameter of 16 mm. The assembly process of the battery used for In-situ FT-IR test was similar to that of the half battery. Subsequently, the assembled simulated battery was placed on the in-situ infrared equipment and connected to the LAND system for in-situ infrared testing. LAND system was selected for battery charge and discharge system, and the charge-discharge current is 0.5 C.

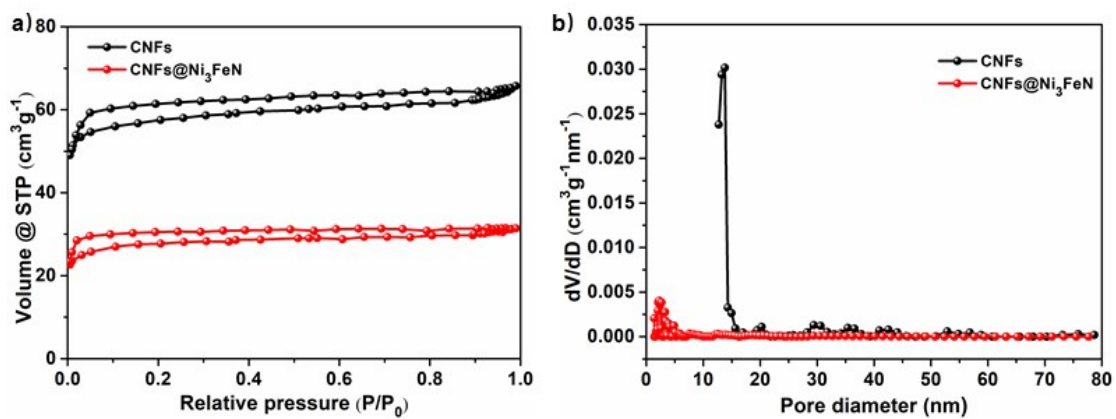

**Fig. S1** a) N<sub>2</sub> adsorption-desorption isotherms. b) Pore size distribution of CNFs and CNFs@Ni<sub>3</sub>FeN.
